# Supplementary material for: Hedgehog participates in the establishment of left-right asymmetry during amphioxus development by controlling Cerberus expression
Source: Oxford University Press journal article supplement (doi:10.1242/dev.157172), 2017-12-15
Supplement: dev157172supp.pdf [file dev157172supp.pdf]

## Supplementary Table and Figures

**Table S1 Primers used in this study**

| Name             | Sequence 5'-3'                                                                      | Target gene      | Restriction site |
|------------------|-------------------------------------------------------------------------------------|------------------|------------------|
| AmphiCerF/R      | F: <u>GGTACCATGAAGACGAGCGTGAGGAGC</u><br>R: <u>ACTAGTTCAGAAGTACTTATCCCCACATG</u>    | <i>Cer</i>       | KpnI/SpeI        |
| AmphiNodalF/R    | F: <u>GGTACCGCAGGCCGAGACCAACACCCGC</u><br>R: <u>ACTAGTCTACTGACAGCCGCATTCATCC</u>    | <i>Nodal</i>     | KpnI/SpeI        |
| AmphiPitxF/R     | F: <u>GGTACCACATATCTAAGGAGGACATCGTG</u><br>R: <u>ACTAGTTCCTTAGCAAACAATCCCATACGC</u> | <i>Ptix</i>      | KpnI/SpeI        |
| AmphiLeftyF/R    | F: <u>CTCGAGTACGATGAAACCTGTTCTAGTT</u><br>R: <u>ACTAGTTTACTGTGTGCACGCACACTG</u>     | <i>Lefty</i>     | XhoI/SpeI        |
| AmphiPtchF/R     | F: ACGGTTGGACATATTCTGTTGC<br>R: TGATACCATCCGCTCATTCTG                               | <i>Ptch</i>      | NA               |
| AmphiFoxE4F/R    | F: <u>GAATTC</u> TGGGAGAAAAACACACACAAC<br>R: <u>ACTAGTGGCATCTT</u> CACAAGAGACGA     | <i>FoxE4</i>     | EcoRI/SpeI       |
| AmphiErrF/R      | F: CCAGACTTCAGTGGACGATGAC<br>R: GGGTCCCTATGTCCCTATGC                                | <i>Err</i>       | NA               |
| AmphiDkk1/2/4F/R | F: <u>GGTACCATGT</u> CGAACTCCATGCTGCAGCT<br>R: <u>ACTAGTCTACTGCTGGC</u> ACGTGTACAGT | <i>Dkk1/2/4</i>  | KpnI/SpeI        |
| AmphiNkx2.1F/R   | F: <u>GAATTC</u> ATGGAGTCCATAAGCCCTAAGC<br>R: <u>ACTAGTTCACCACGCTCTGCCCTGCTGT</u>   | <i>Nkx2.1</i>    | EcoRI/SpeI       |
| AmphiKroxF/R     | F: <u>GGTACCACACACCGCTTCCCTGCTGA</u><br>R: <u>ACTAGTCGTA</u> AAATGAACCGTGAACCCA     | <i>Krox</i>      | KpnI/SpeI        |
| AmphiHhF1/R1     | F: <u>GAATTC</u> GAATTTAGCCGTTAATAGGGAG<br>R: <u>ACTAGTACACACAGCCGAGTAGACACTT</u>   | <i>Hh</i>        | EcoRI/SpeI       |
| AmphiHhF2/R2     | F: GAATTTAGCCGTTAATAGGGAG<br>R: GCGAGTAATCCGTCCGTTGA                                | <i>Hh</i>        | NA               |
| AmphiWnt3F/R     | F: GGCATCCCATTGGAAGTACTC<br>R: TCATTTGCACGTGTGCACCTG                                | <i>Wnt3</i>      | NA               |
| AmphiPax2/5/8    | F: ATGGACAGGATGACCACGATG<br>R: GTGAGAAGAGAAGAAGTTGCC                                | <i>Pax2/5/8</i>  | NA               |
| Amphi-m-actin    | F: TCAGGGCGTGATGGTCCGGTAT<br>R: GGTGGACAGGGAAGCCAAGAT                               | <i>m-actin</i>   | NA               |
| AmphiMRF2        | F: ATGAACTACACAGAGCTGAGCA<br>R: TTGAACAAGATTTTGGCACGGT                              | <i>MRF2</i>      | NA               |
| AmphiNetrin      | F: TGTAACAGTGACCCATTCCG<br>R: CACATGGCATGAAGGTTGA                                   | <i>Netrin</i>    | NA               |
| AmphiBrachyury   | F: AGACCAGCGTCAACAACGAGATG<br>R: AACAACTGGAGCCCYATGAC                               | <i>Brachyury</i> | NA               |
| AmphiZic         | F: AGGCCTTTCGCATGGATTGT<br>R: CTGCCTCTGCGTTCATTTGC                                  | <i>Zic</i>       | NA               |

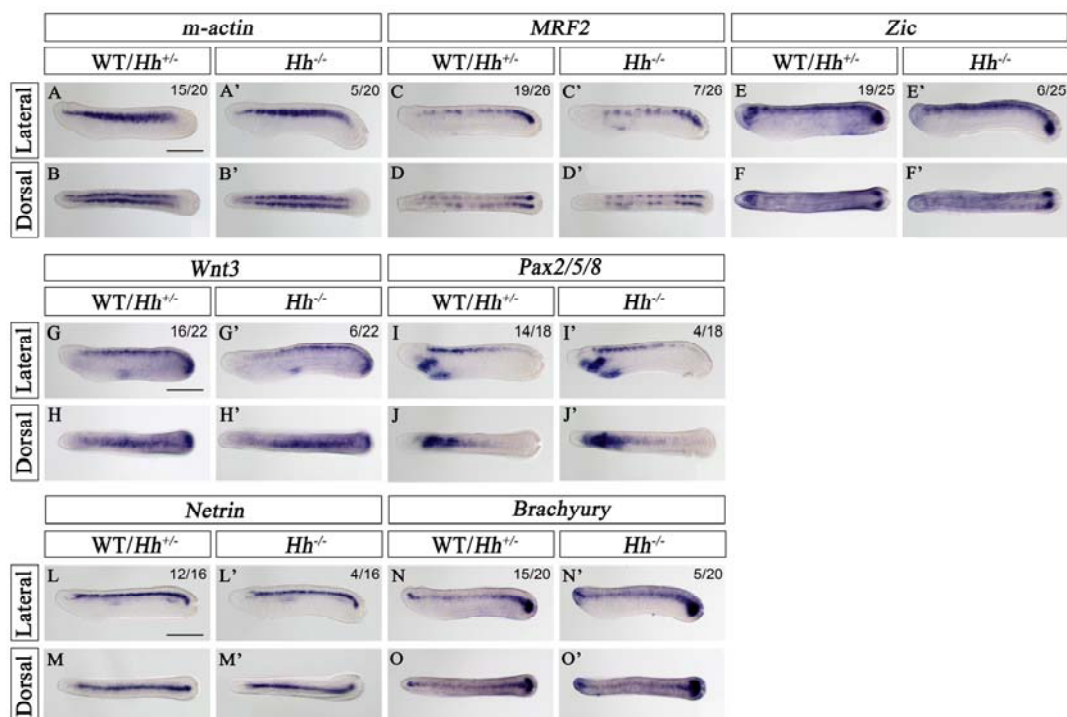

**Figure S1. The expression pattern of middle line structure and somite marker genes in the embryos at late neurula stage.**

(A-B') The expression of *m-actin* specific to somite in wild-type/heterozygote embryos, symmetric expression pattern of *m-actin* in *Hh*<sup>-/-</sup> mutant. (C-D') The expression of *MRF2* limited to posterior somites in normal embryos, no difference were observed in *Hh*<sup>-/-</sup> mutant. (E-F') The expression of *Zic* in the dorsal lateral somites, *Hh* knockout had no effects on *Zic* expression. (G-J') The expression of *Wnt3* and *Pax2/5/8* mark the neural tube in amphioxus, no differences are observable in *Hh*<sup>-/-</sup> mutant. (L-O') *Netrin* and *Brachyury* expression in the neural tube and notochord in the embryos, *Hh* knockout did not effect on the *Netrin* and *Brachyury* expression. All embryos are positioned with anterior to the left. The scale bar is 200  $\mu$ m.

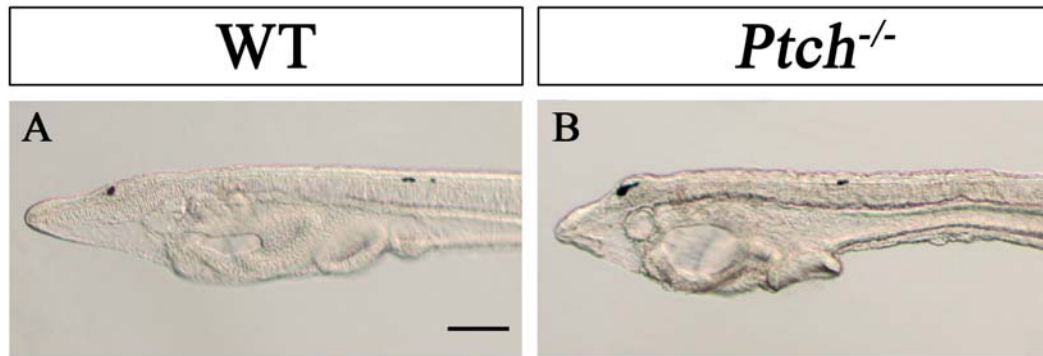

**Figure S2. Phenotype resulted from *Ptch* knock out in amphioxus.**

(A) The left lateral view of wild-type amphioxus showing a normal development of mouth and gill slits. (B) *Ptch* knockout did not effect on the left-right patterning but resulted in an enlarged pigment spot and mouth. The scale bar is 100  $\mu$ m.

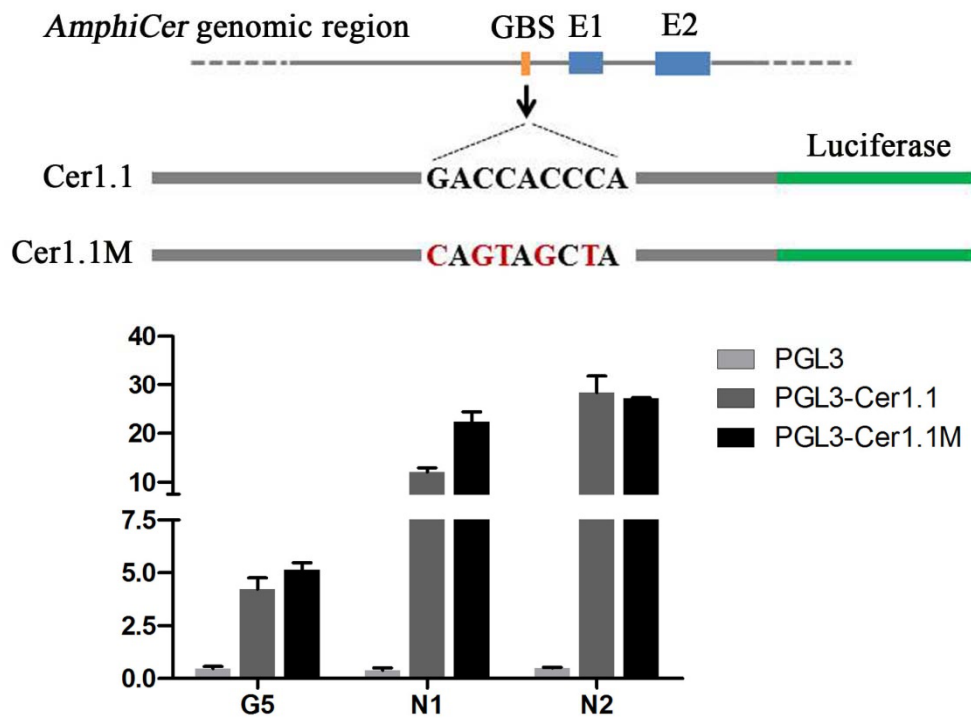

**Figure S3. *Cer*-Luciferase reporter activity in amphioxus luciferase assay.**

Luciferase reporter plasmids containing a deduced Gli-binding site or a mutant deduced Gli-binding site were injected into amphioxus eggs. Each egg were injected with reporter plasmid and reference plasmid pTK-Renilla luciferase (10:1). Luciferase values were obtained at G5, N1 and N2 stages respectively. Firefly and Renilla luciferase values were obtained by the standard protocol provided by the producer (Promega). **GBS**, Gli binding site; Point mutations are marked in red letters; **E**, exon; **G5**, late-gastrula; **N1**, early neurula; **N2**, mid-neurula.

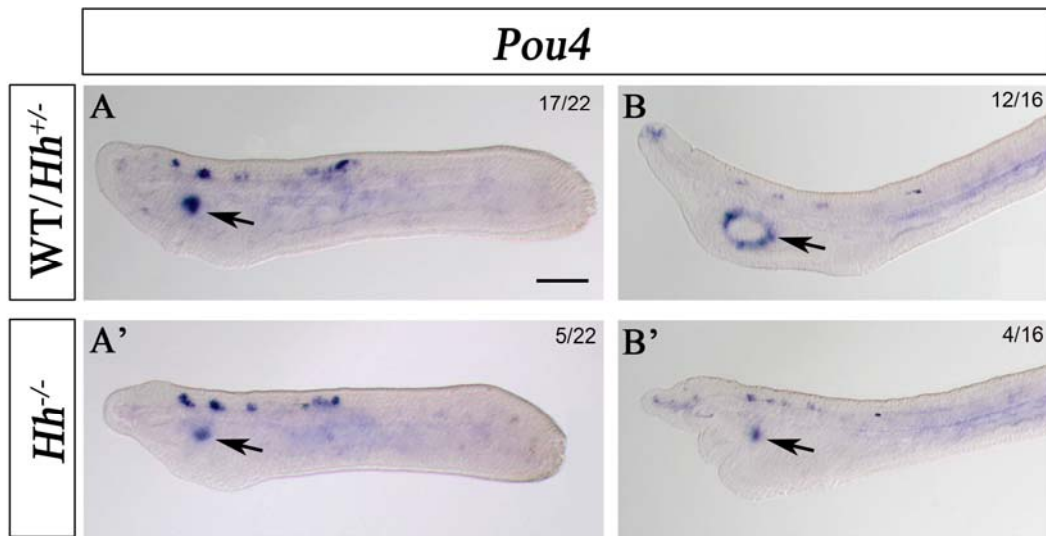

**Figure S4. Oral mesovesicle and mouth opening shown with *Pou4* expression in amphioxus.**

(A) Left lateral view showing *Pou4* expression in oral mesovesicle. (B) Mouth opening indicated by *pou4* expression. (A') *Pou4* expression at oral mesovesicle was reduced slightly in *Hh*<sup>-/-</sup> embryos. (B') Disappeared mouth opening was disclosed by *Pou4* expression in *Hh*<sup>-/-</sup> amphioxus. Arrows indicate mouths in the figures. The scale bar is 100  $\mu$ m.
